# Supplementary material for: Identification of Prognostic Gene Biomarkers in Non-Small Cell Lung Cancer Progression by Integrated Bioinformatics Analysis
Source: MDPI journal article supplement (doi:10.3390/biology10111200), 2021-11-18
Supplement: s1 [file s1]

## **SUPPLEMENTARY MATERIAL**

**Figure S1:** Significant DEGs of the combined microarray datasets of TGF- $\beta$ -induced EMT in NSCLC cell lines

**Figure S2:** Protein-protein interaction network of DEGs in EMT of NSCLC cells

**Figure S3:** Prognostic value of genes associated with EMT in NSCLC – Survival until first progression (FP)

**Figure S4:** Prognostic value of genes associated with EMT in NSCLC – Post (first) progression survival (PPS)

**Table S1:** List of the 20 most highly ranked upregulated genes in EMT of NSCLC cells with their z-scores, listed in order of their FDR values

**Table S2:** List of the 20 most highly ranked downregulated genes in EMT of NSCLC cells with their z-scores, listed in order of their FDR values

**Table S3:** Genes with their z-scores from the PPI network-based clustered modules in EMT of NSCLC cells, listed in order of their FDR values

**Table S4:** List of datasets sourced for patient survival analysis

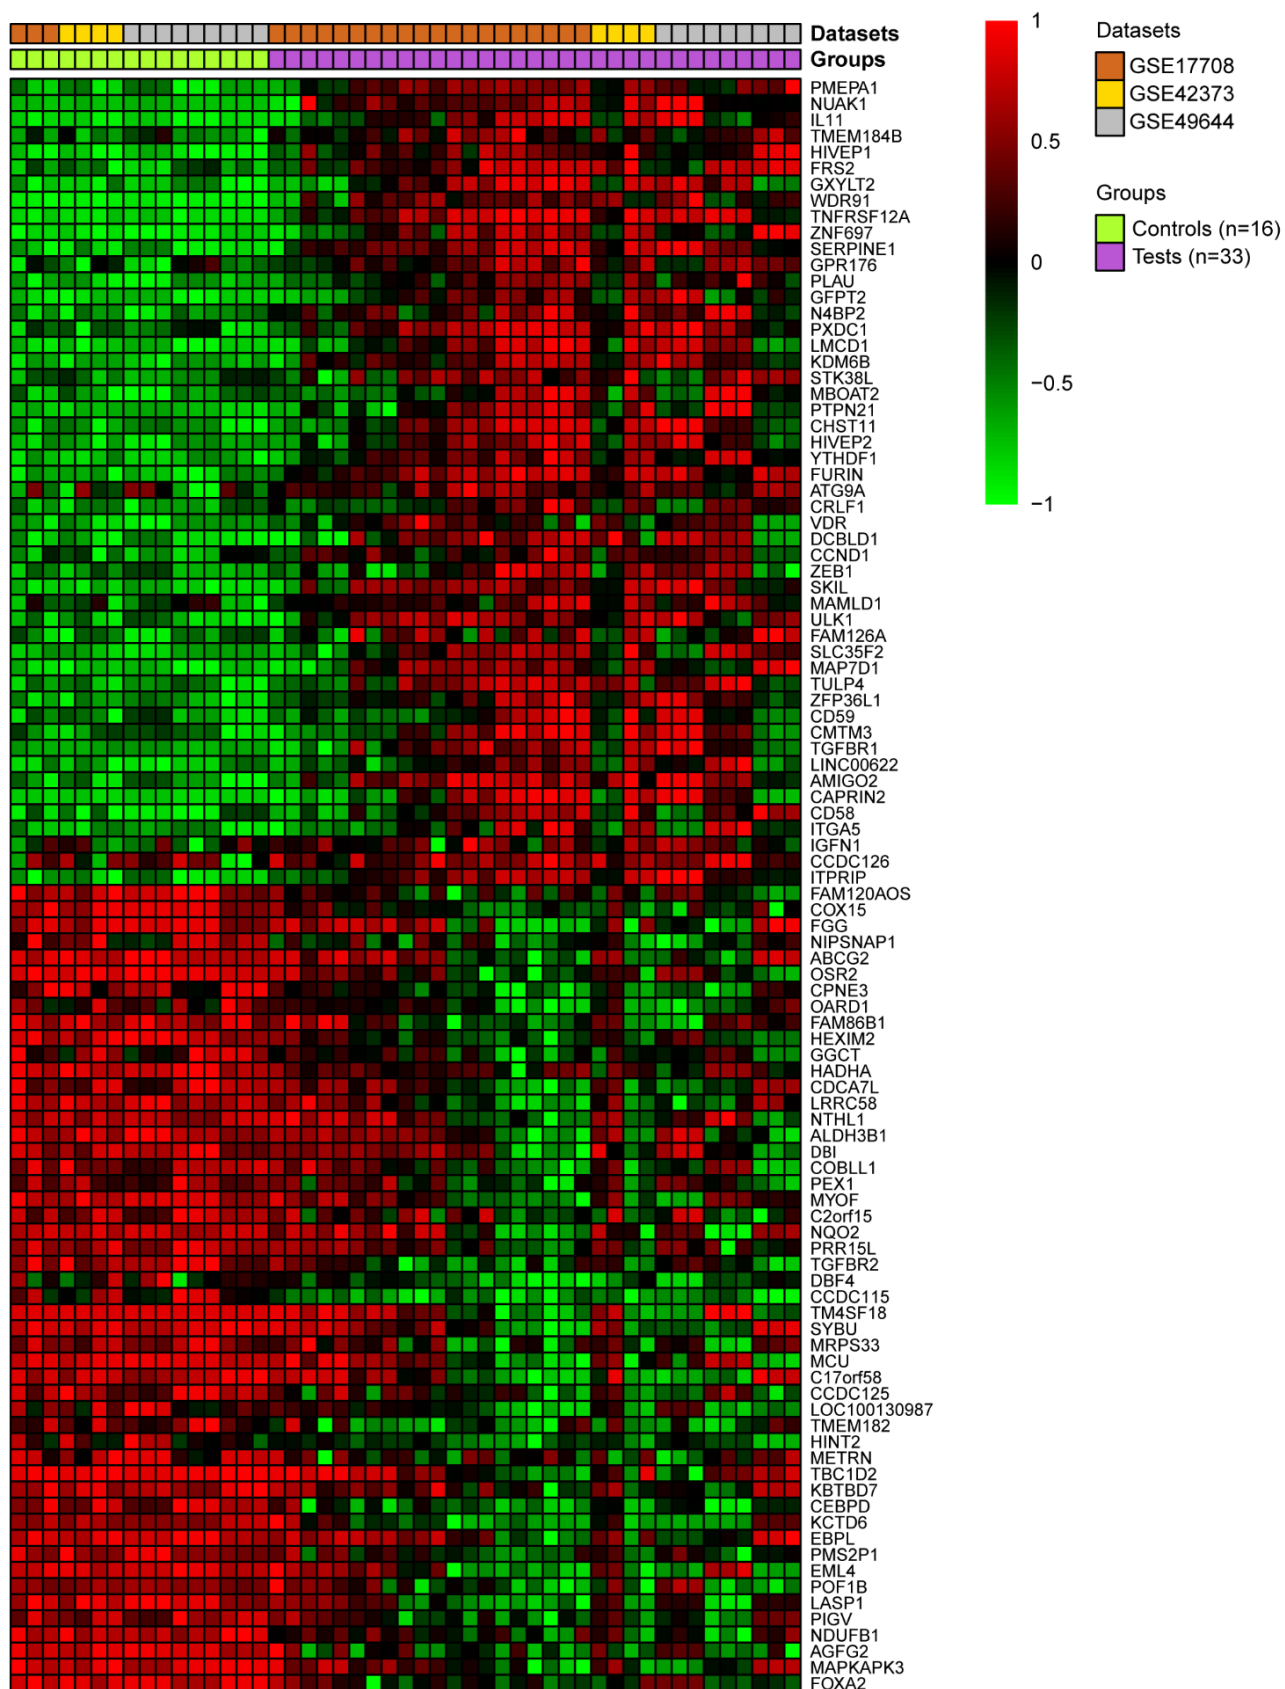

**Figure S1.** Significant DEGs of the combined microarray datasets of TGF- $\beta$ -induced EMT in NSCLC cell lines. Heatmap of the top 100 DEGs from the combined microarray datasets listed according to their ranking based on their z-scores.

**Table S1.** List of the 20 most highly ranked upregulated genes in EMT of NSCLC cells with their z-scores, listed in order of their FDR values.

| Gene symbol   | Gene name                                                      | FDR*                  | Z-score |
|---------------|----------------------------------------------------------------|-----------------------|---------|
| <i>PMEPA1</i> | prostate transmembrane protein, androgen induced 1             | $6.20 \times 10^{-5}$ | 5.888   |
| <i>NUAK1</i>  | NUAK family kinase 1                                           | $1.08 \times 10^{-4}$ | 5.679   |
| <i>FRS2</i>   | fibroblast growth factor receptor substrate 2                  | $1.69 \times 10^{-4}$ | 5.332   |
| <i>GXYLT2</i> | glucoside xylosyltransferase 2                                 | $1.69 \times 10^{-4}$ | 5.323   |
| <i>HIVEP1</i> | human immunodeficiency virus type I enhancer binding protein 1 | $1.69 \times 10^{-4}$ | 5.372   |
| <i>IL11</i>   | interleukin 11                                                 | $1.69 \times 10^{-4}$ | 5.402   |
| <i>WDR91</i>  | WD repeat domain 91                                            | $1.69 \times 10^{-4}$ | 5.320   |
| <i>ZNF697</i> | zinc finger protein 697                                        | $3.69 \times 10^{-4}$ | 5.153   |
| <i>GPR176</i> | G protein-coupled receptor 176                                 | $4.89 \times 10^{-4}$ | 5.041   |
| <i>GFPT2</i>  | glutamine-fructose-6-phosphate transaminase 2                  | $5.99 \times 10^{-4}$ | 4.961   |
| <i>N4BP2</i>  | NEDD4 binding protein 2                                        | $5.99 \times 10^{-4}$ | 4.956   |
| <i>PLAU</i>   | plasminogen activator, urokinase                               | $5.99 \times 10^{-4}$ | 4.966   |
| <i>PXDC1</i>  | PX domain containing 1                                         | $7.12 \times 10^{-4}$ | 4.913   |
| <i>LMCD1</i>  | LIM and cysteine rich domains 1                                | $1.04 \times 10^{-3}$ | 4.810   |
| <i>KDM6B</i>  | lysine demethylase 6B                                          | $1.07 \times 10^{-3}$ | 4.795   |
| <i>STK38L</i> | serine/threonine kinase 38 like                                | $1.10 \times 10^{-3}$ | 4.774   |
| <i>PTPN21</i> | protein tyrosine phosphatase, non-receptor type 21             | $1.23 \times 10^{-3}$ | 4.736   |
| <i>HIVEP2</i> | human immunodeficiency virus type I enhancer binding protein 2 | $1.60 \times 10^{-3}$ | 4.669   |
| <i>YTHDF1</i> | YTH N6-methyladenosine RNA binding protein 1                   | $1.82 \times 10^{-3}$ | 4.629   |
| <i>ATG9A</i>  | autophagy related 9A                                           | $2.29 \times 10^{-3}$ | 4.539   |

\*  $p < 0.05$  corrected by BH FDR

**Table S2.** List of the 20 most highly ranked downregulated genes in EMT of NSCLC cells with their z-scores, listed in order of their FDR values.

| Gene symbol         | Gene name                                                     | FDR*                    | Z-score |
|---------------------|---------------------------------------------------------------|-------------------------|---------|
| <i>FOXA2</i>        | forkhead box A2                                               | 1.69 x 10 <sup>-4</sup> | -5.316  |
| <i>AGFG2</i>        | ArfGAP with FG repeats 2                                      | 4.37 x 10 <sup>-4</sup> | -5.076  |
| <i>MAPKAPK3</i>     | mitogen-activated protein kinase-activated protein kinase 3   | 4.37 x 10 <sup>-4</sup> | -5.079  |
| <i>NDUFB1</i>       | NADH:ubiquinone oxidoreductase subunit B1                     | 5.54 x 10 <sup>-4</sup> | -5.005  |
| <i>PIGV</i>         | phosphatidylinositol glycan anchor biosynthesis class V       | 7.41 x 10 <sup>-4</sup> | -4.895  |
| <i>LASP1</i>        | LIM and SH3 protein 1                                         | 7.58 x 10 <sup>-4</sup> | -4.882  |
| <i>EML4</i>         | echinoderm microtubule associated protein like 4              | 1.78 x 10 <sup>-3</sup> | -4.640  |
| <i>EBPL</i>         | emopamil binding protein like                                 | 2.00 x 10 <sup>-3</sup> | -4.596  |
| <i>PMS2P1</i>       | PMS1 homolog 2, mismatch repair system component pseudogene 1 | 2.00 x 10 <sup>-3</sup> | -4.600  |
| <i>CEBPD</i>        | CCAAT enhancer binding protein delta                          | 2.23 x 10 <sup>-3</sup> | -4.556  |
| <i>KCTD6</i>        | potassium channel tetramerization domain containing 6         | 2.23 x 10 <sup>-3</sup> | -4.557  |
| <i>KBTBD7</i>       | kelch repeat and BTB domain containing 7                      | 2.29 x 10 <sup>-3</sup> | -4.541  |
| <i>TBC1D2</i>       | TBC1 domain family member 2                                   | 2.55 x 10 <sup>-3</sup> | -4.511  |
| <i>METRNL</i>       | meteorin, glial cell differentiation regulator                | 2.59 x 10 <sup>-3</sup> | -4.498  |
| <i>HINT2</i>        | histidine triad nucleotide binding protein 2                  | 2.75 x 10 <sup>-3</sup> | -4.470  |
| <i>TMEM182</i>      | transmembrane protein 182                                     | 2.98 x 10 <sup>-3</sup> | -4.443  |
| <i>LOC100130987</i> | uncharacterized LOC100130987                                  | 3.11 x 10 <sup>-3</sup> | -4.430  |
| <i>CCDC125</i>      | coiled-coil domain containing 125                             | 3.22 x 10 <sup>-3</sup> | -4.418  |
| <i>C17orf58</i>     | chromosome 17 open reading frame 58                           | 3.38 x 10 <sup>-3</sup> | -4.403  |
| <i>MCU</i>          | mitochondrial calcium uniporter                               | 3.53 x 10 <sup>-3</sup> | -4.381  |

\*  $p < 0.05$  corrected by BH FDR

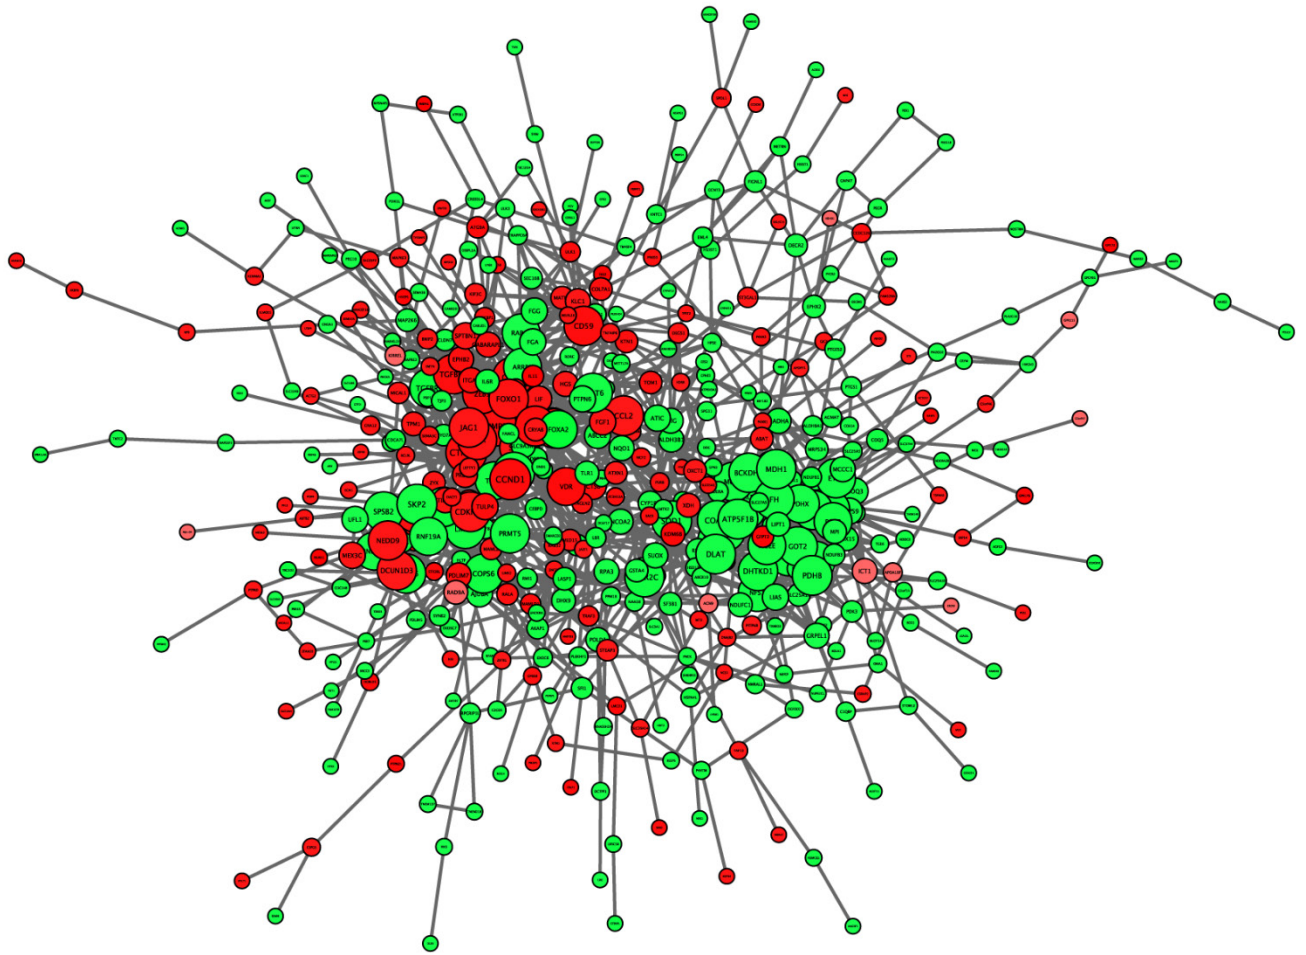

**Figure S2.** Protein-protein interaction network of DEGs in EMT of NSCLC cells. Network construction of proteins encoded by the total DEGs was carried out. All nodes with a combined interaction score  $> 0.4$  are displayed, whereas isolated nodes are ignored. Larger nodes have a central regulatory role with a centrality degree  $\geq 11.0$ . Red indicates upregulated and green shows downregulated node genes.

**Table S3.** Genes with their z-scores from the PPI network-based clustered modules in EMT of NSCLC cells, listed in order of their FDR values.

| Gene symbol     | Gene name                                                | FDR*                  | Z-score |
|-----------------|----------------------------------------------------------|-----------------------|---------|
| <b>Module 1</b> |                                                          |                       |         |
| <i>KCTD6</i>    | potassium channel tetramerization domain containing 6    | $2.23 \times 10^{-3}$ | -4.557  |
| <i>KBTBD7</i>   | kelch repeat and BTB domain containing 7                 | $2.29 \times 10^{-3}$ | -4.541  |
| <i>TULP4</i>    | tubby like protein 4                                     | $4.88 \times 10^{-3}$ | 4.255   |
| <i>KLHL25</i>   | kelch like family member 25                              | $6.58 \times 10^{-3}$ | 4.024   |
| <i>FBXO32</i>   | F-box protein 32                                         | $8.94 \times 10^{-3}$ | 3.911   |
| <i>COPS6</i>    | COP9 signalosome subunit 6                               | $9.32 \times 10^{-3}$ | -3.875  |
| <i>LMO7</i>     | LIM domain 7                                             | $1.19 \times 10^{-2}$ | -3.758  |
| <i>SKP2</i>     | S-phase kinase associated protein 2                      | $1.53 \times 10^{-2}$ | -3.658  |
| <i>SPSB2</i>    | splA/ryanodine receptor domain and SOCS box containing 2 | $2.07 \times 10^{-2}$ | -3.495  |
| <i>MEX3C</i>    | mex-3 RNA binding family member C                        | $2.73 \times 10^{-2}$ | 3.347   |
| <i>RNF115</i>   | ring finger protein 115                                  | $2.96 \times 10^{-2}$ | -3.306  |
| <i>UFL1</i>     | UFM1 specific ligase 1                                   | $3.78 \times 10^{-2}$ | -3.187  |
| <i>RNF19A</i>   | ring finger protein 19A, RBR E3 ubiquitin protein ligase | $4.77 \times 10^{-2}$ | -3.075  |
| <i>DCUNID3</i>  | defective in cullin neddylation 1 domain containing 3    | $4.81 \times 10^{-2}$ | 3.071   |
| <b>Module 2</b> |                                                          |                       |         |
| <i>FOXA2</i>    | forkhead box A2                                          | $1.69 \times 10^{-4}$ | -5.316  |
| <i>PLAU</i>     | plasminogen activator, urokinase                         | $5.99 \times 10^{-4}$ | 4.966   |
| <i>CCND1</i>    | cyclin D1                                                | $2.82 \times 10^{-3}$ | 4.460   |
| <i>TGFBRI</i>   | transforming growth factor beta receptor 1               | $5.16 \times 10^{-3}$ | 4.205   |
| <i>FGG</i>      | fibrinogen gamma chain                                   | $5.26 \times 10^{-3}$ | -4.162  |
| <i>MMP2</i>     | matrix metalloproteinase 2                               | $5.60 \times 10^{-3}$ | 4.108   |
| <i>DHTKD1</i>   | dehydrogenase E1 and transketolase domain containing 1   | $5.60 \times 10^{-3}$ | -4.117  |
| <i>CTNNB1</i>   | catenin beta 1                                           | $5.69 \times 10^{-3}$ | 4.098   |
| <i>KTN1</i>     | kinectin 1                                               | $6.45 \times 10^{-3}$ | 4.040   |
| <i>BMP2</i>     | bone morphogenetic protein 2                             | $1.11 \times 10^{-2}$ | 3.790   |
| <i>FGA</i>      | fibrinogen alpha chain                                   | $1.24 \times 10^{-2}$ | -3.736  |
| <i>TIMP3</i>    | TIMP metalloproteinase inhibitor 3                       | $2.06 \times 10^{-2}$ | 3.500   |
| <i>GSTA4</i>    | glutathione S-transferase alpha 4                        | $2.34 \times 10^{-2}$ | -3.422  |
| <i>CDH2</i>     | cadherin 2                                               | $2.45 \times 10^{-2}$ | 3.395   |
| <i>SOD1</i>     | superoxide dismutase 1                                   | $2.45 \times 10^{-2}$ | -3.392  |
| <i>MATN3</i>    | matrilin 3                                               | $2.96 \times 10^{-2}$ | 3.308   |
| <i>GOLM1</i>    | Golgi membrane protein 1                                 | $2.96 \times 10^{-2}$ | -3.308  |
| <i>PDHX</i>     | pyruvate dehydrogenase complex component X               | $3.20 \times 10^{-2}$ | -3.269  |
| <i>CDH1</i>     | cadherin 1                                               | $3.20 \times 10^{-2}$ | -3.267  |
| <i>JAG1</i>     | jagged 1                                                 | $3.57 \times 10^{-2}$ | 3.214   |
| <i>CDKN1A</i>   | cyclin dependent kinase inhibitor 1A                     | $3.78 \times 10^{-2}$ | 3.187   |
| <i>NQO1</i>     | NAD(P)H quinone dehydrogenase 1                          | $3.91 \times 10^{-2}$ | -3.170  |
| <i>GPI</i>      | glucose-6-phosphate isomerase                            | $3.99 \times 10^{-2}$ | -3.160  |
| <i>CCL2</i>     | C-C motif chemokine ligand 2                             | $4.01 \times 10^{-2}$ | 3.158   |
| <i>GCLC</i>     | glutamate-cysteine ligase catalytic subunit              | $4.04 \times 10^{-2}$ | -3.154  |
| <i>MDH1</i>     | malate dehydrogenase 1                                   | $4.63 \times 10^{-2}$ | -3.087  |
| <b>Module 3</b> |                                                          |                       |         |

|                 |                                        |                       |        |
|-----------------|----------------------------------------|-----------------------|--------|
| <i>TXNRD1</i>   | thioredoxin reductase 1                | $1.63 \times 10^{-2}$ | -3.617 |
| <i>PDHB</i>     | pyruvate dehydrogenase E1 beta subunit | $1.72 \times 10^{-2}$ | -3.589 |
| <i>DLAT</i>     | dihydrolipoamide S-acetyltransferase   | $2.20 \times 10^{-2}$ | -3.461 |
| <i>FH</i>       | fumarate hydratase                     | $2.89 \times 10^{-2}$ | -3.322 |
| <i>GSR</i>      | glutathione-disulfide reductase        | $3.84 \times 10^{-2}$ | -3.177 |
| <b>Module 4</b> |                                        |                       |        |
| <i>MRPS33</i>   | mitochondrial ribosomal protein S33    | $3.72 \times 10^{-3}$ | -4.362 |
| <i>MRPL24</i>   | mitochondrial ribosomal protein L24    | $7.27 \times 10^{-3}$ | -3.980 |
| <i>MRPS34</i>   | mitochondrial ribosomal protein S34    | $1.72 \times 10^{-2}$ | -3.591 |
| <i>MRPL58</i>   | mitochondrial ribosomal protein L58    | $3.61 \times 10^{-2}$ | -3.209 |
| <i>MRPS9</i>    | mitochondrial ribosomal protein S9     | $3.92 \times 10^{-2}$ | -3.168 |

\*  $p < 0.05$  corrected by BH FDR

**Table S4.** List of datasets sourced for patient survival analysis.

| OS       | FP       | PPS      |
|----------|----------|----------|
| caArray  | caArray  | caArray  |
| GSE14814 | GSE29013 | GSE29013 |
| GSE19188 | GSE31210 | GSE31210 |
| GSE29013 | GSE31908 | GSE31908 |
| GSE30219 | GSE50081 | GSE50081 |
| GSE31210 | GSE8894  |          |
| GSE3141  |          |          |
| GSE31908 |          |          |
| GSE37745 |          |          |
| GSE4573  |          |          |
| GSE50081 |          |          |
| TCGA     |          |          |

OS: overall survival; FP: survival until first progression;

PPS: post (first) progression survival

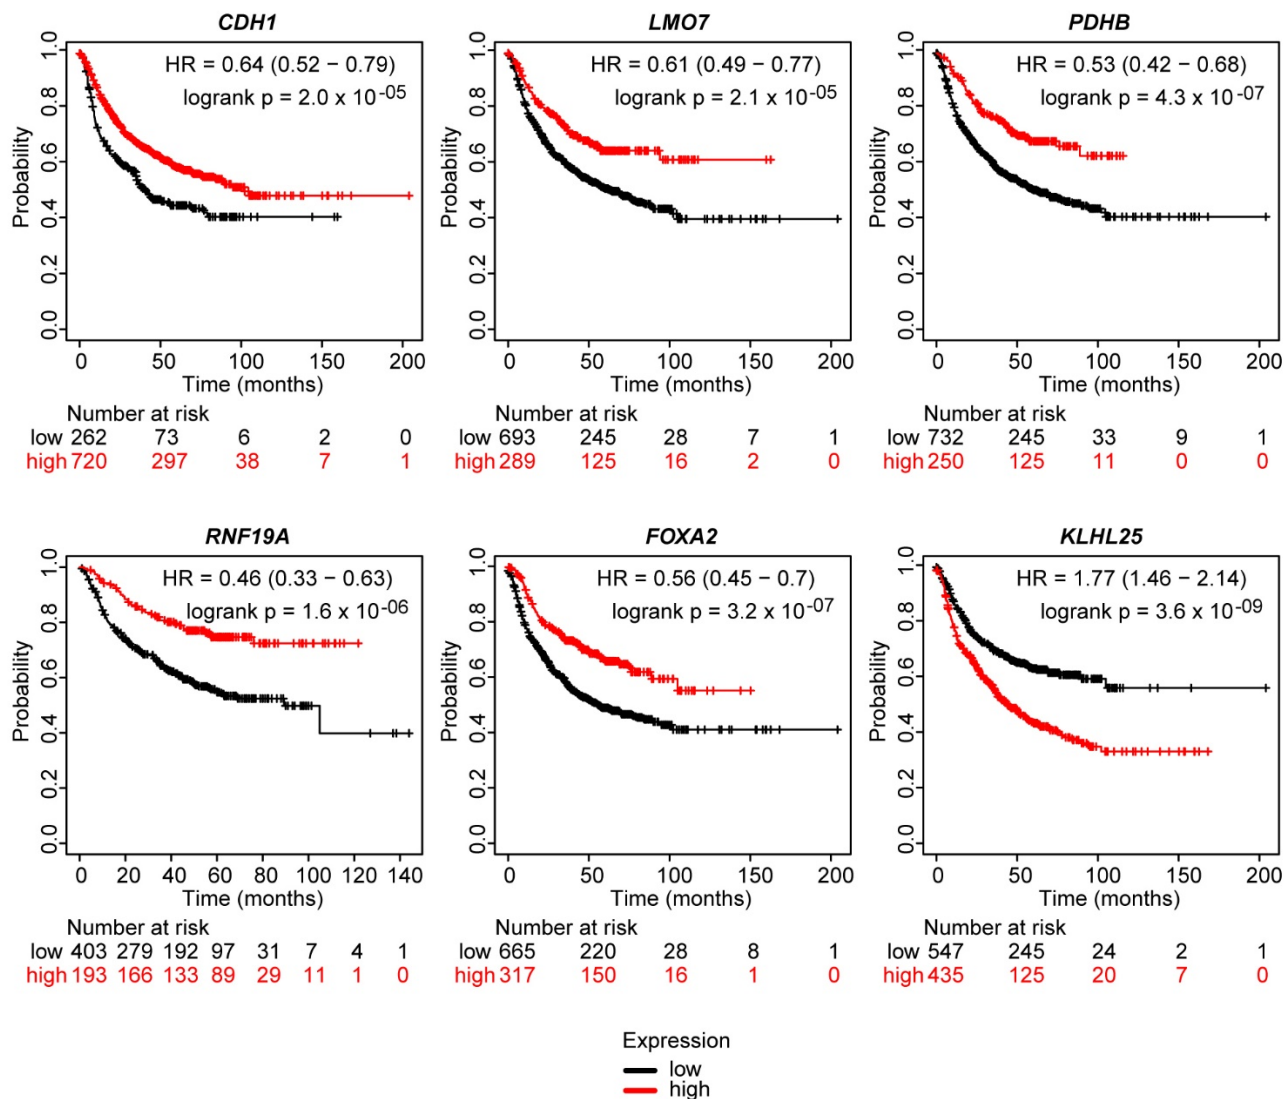

**Figure S3.** Prognostic value of genes associated with EMT in NSCLC – Survival until first progression (FP). Kaplan–Meier survival curves showing the correlation between marker gene expression and survival until FP in patients with NSCLC (n=596). Significance thresholds for potential gene biomarkers include a log-rank test  $p < 0.001$  and a corrected  $p < 0.05$  by BH FDR for the patient cut-off selection method. Low expression levels of *CDH1*, *LMO7*, *PDHB*, *RNF19A* and *FOXA2* whereas high expression level of *KLHL25* were associated with reduced survival until FP. HR: hazard ratio.



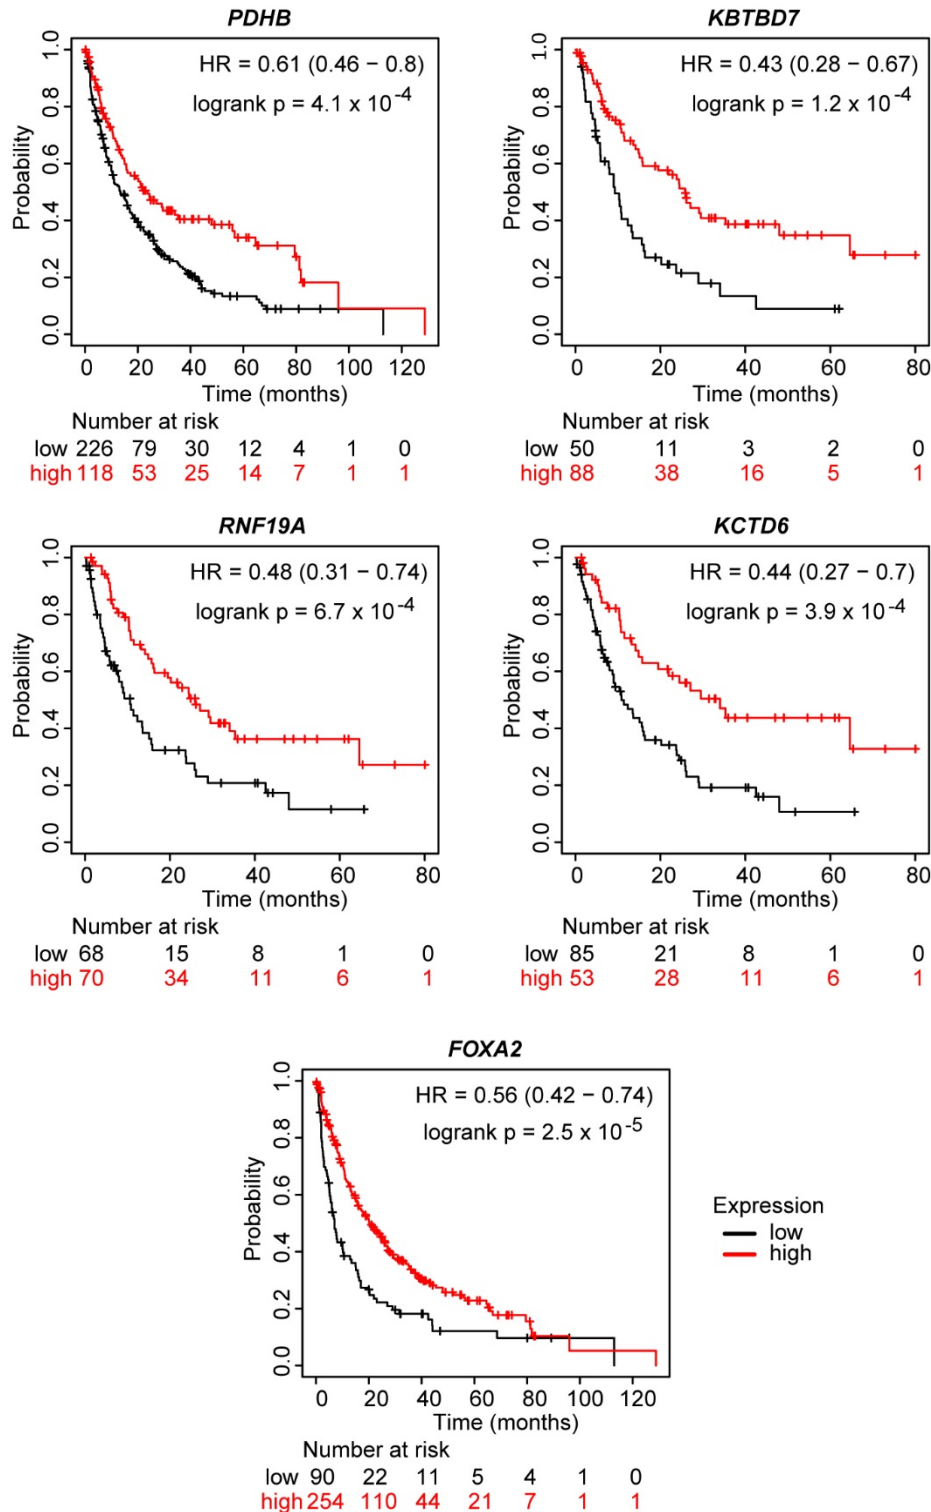

**Figure S4.** Prognostic value of genes associated with EMT in NSCLC – Post (first) progression survival (PPS). Kaplan–Meier survival curves showing the correlation between marker gene expression and PPS in patients with NSCLC (n=138). Significance thresholds for potential gene biomarkers include a log-rank test  $p < 0.001$  and a corrected  $p < 0.05$  by BH FDR for the patient cut-off selection method. Low expression levels of *PDHB*, *KBTBD7*, *RNF19A*, *KCTD6* and *FOXA2* were associated with reduced PPS. HR: hazard ratio.
